# Supplementary material for: Enhanced adsorption performance of aspartic acid intercalated Mg-Zn-Fe-LDH materials for arsenite
Source: Royal Society of Chemistry journal article supplement (doi:10.1039/c8dt00199e), 2018-01-01
Supplement: c8dt00199e1.pdf [file c8dt00199e1.pdf]

## Supporting Information

### Enhanced Adsorption Performance of Aspartic Acid Intercalated Mg-Zn-Fe-LDHs Material for Arsenite

Lu Hongtao<sup>a,b</sup>, Lu Tiantian<sup>a</sup>, Zhang Hua<sup>a</sup>, Qiu Yanling<sup>c</sup>, Yin Daqiang<sup>c</sup>, Zhu Zhiliang<sup>a,c\*</sup>

<sup>a</sup>State Key Laboratory of Pollution Control and Resource Reuse, Tongji University, Shanghai 200092, China;

<sup>b</sup>Post Doctoral Research Station, College of Civil Engineering, Tongji University, Shanghai 200092, China

<sup>c</sup>Key Laboratory of Yangtze River Water Environment, Ministry of Education, Tongji University, Shanghai 200092, China;

#### \*Correspondence information:

ZhiliangZhu, Professor

State Key Laboratory of Pollution Control and Resource Reuse, Tongji University, 1239 Siping Road, Shanghai, 200092, China.

E-mail: [zzl@tongji.edu.cn](mailto:zzl@tongji.edu.cn)

Phone: +86-21-6598 2426, Fax: +86-21-6598 4626

## Supporting Information:

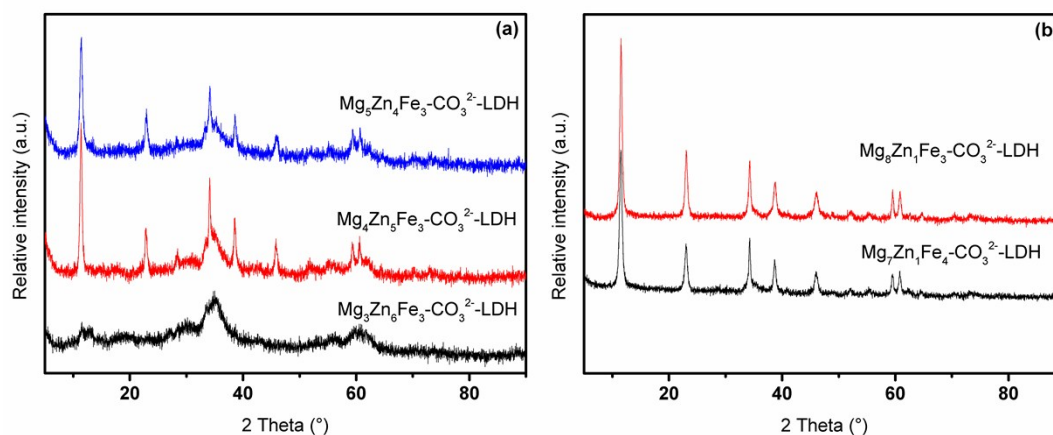

Fig.S1 XRD patterns of carbonate intercalated LDHs with different metal ratios

Table S1 The data sheet of specific surface analysis

| Materials                                                | BET surface area (m <sup>2</sup> ·g <sup>-1</sup> ) | C-value in BET equation | Pore volume (cm <sup>3</sup> ·g <sup>-1</sup> ) | Average Pore Diameters (nm) | particle Diameters (nm) | practical surface area (m <sup>2</sup> ·g <sup>-1</sup> ) |
|----------------------------------------------------------|-----------------------------------------------------|-------------------------|-------------------------------------------------|-----------------------------|-------------------------|-----------------------------------------------------------|
| Mg <sub>7</sub> Zn <sub>1</sub> Fe <sub>4</sub> -Asp-LDH | 157.2                                               | 220.1                   | 0.1406                                          | 3.713                       | 10                      | 300                                                       |
| Mg <sub>7</sub> Zn <sub>1</sub> Fe <sub>4</sub> -Phe-LDH | 92.28                                               | 152.2                   | 0.1414                                          | 3.934                       | 9                       | 333                                                       |

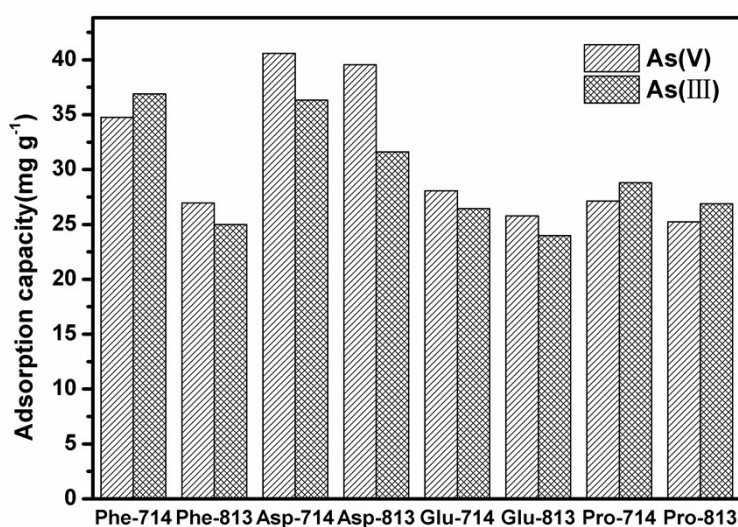

Fig.S2 The preliminary screening of obtained LDHs materials for the adsorption performance of arsenic species

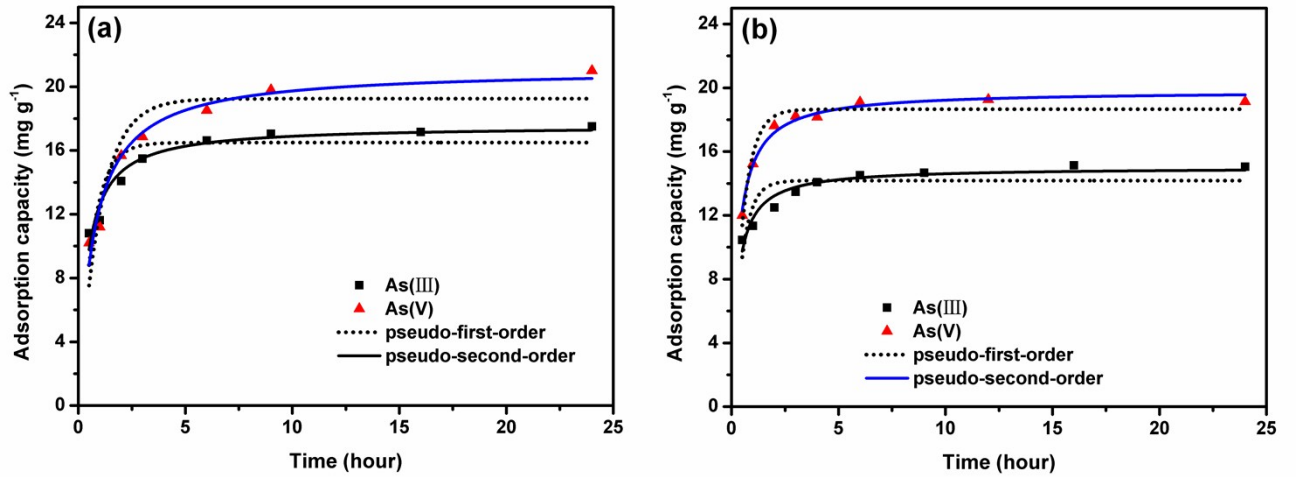

Fig.S3 (a) Adsorption kinetics of arsenic on  $Mg_7Zn_1Fe_4$ -Asp-LDH, (b) Adsorption kinetics of arsenic on  $Mg_7Zn_1Fe_4$ -Phe-LDH

Table S2 Adsorption kinetic model fitting parameters

|                         |         | Pseudo-first-order          |                      |       | Pseudo-second-order         |                                         |        |
|-------------------------|---------|-----------------------------|----------------------|-------|-----------------------------|-----------------------------------------|--------|
|                         |         | $q_e$ ( $mg \cdot g^{-1}$ ) | $k_1$ ( $min^{-1}$ ) | $R^2$ | $q_e$ ( $mg \cdot g^{-1}$ ) | $k_2$ ( $g \cdot (mg \cdot min)^{-1}$ ) | $R^2$  |
| $Mg_7Zn_1Fe_4$ -Asp-LDH | As(III) | 16.5                        | 1.5298               | 0     | 17.6                        | 0.1432                                  | 0.9420 |
|                         | As(V)   | 19.2                        | 0.9928               | 6     | 21.1                        | 0.06782                                 | 0.9540 |
| $Mg_7Zn_1Fe_4$ -Phe-LDH | As(III) | 14.2                        | 2.1663               | 3     | 15.0                        | 0.2472                                  | 0.9215 |
|                         | As(V)   | 18.6                        | 1.8834               | 7     | 19.8                        | 0.1652                                  | 0.9834 |

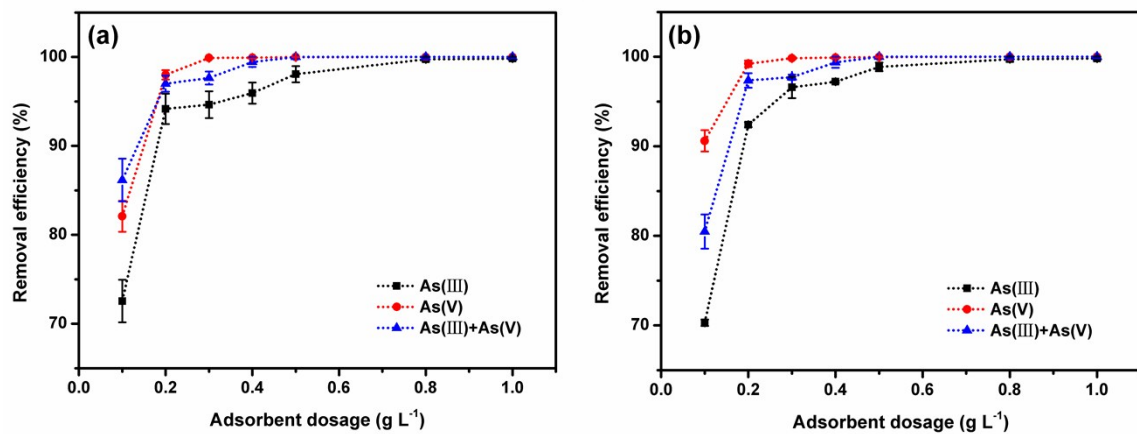

**Fig.S4 (a) Effect of  $Mg_7Zn_1Fe_4$ -Asp-LDH dosage on arsenic adsorption, (b) Effect of  $Mg_7Zn_1Fe_4$ -Phe-LDH dosage on arsenic adsorption**

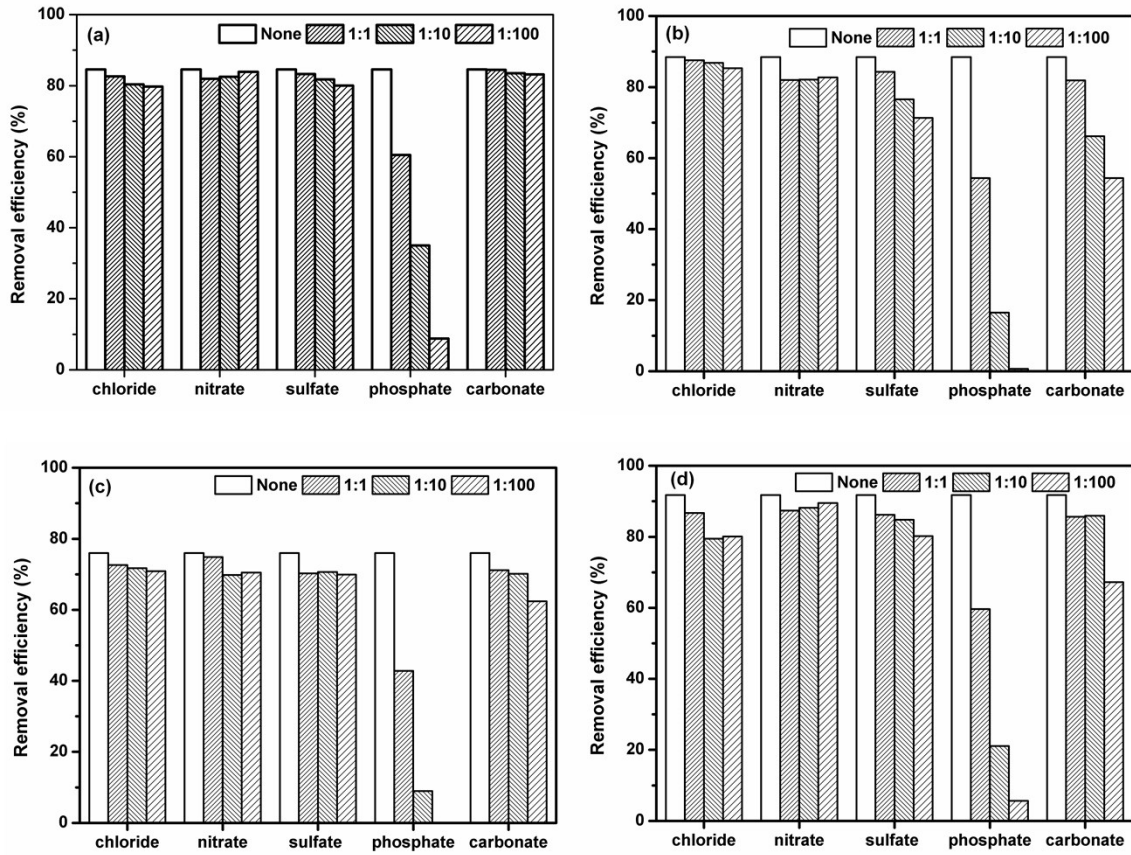

**Fig.S5 (a) Effect of anions for As(III) adsorption on  $Mg_7Zn_1Fe_4$ -Asp-LDH, (b) Effect of anions for As(V) adsorption on  $Mg_7Zn_1Fe_4$ -Asp-LDH, (c) Effect of anions for As(III) adsorption on  $Mg_7Zn_1Fe_4$ -Phe-LDH, (d) Effect of anions for As(V) adsorption on  $Mg_7Zn_1Fe_4$ -Phe-LDH**

**Table S3 Desorption rate of materials after adsorption arsenic**

|                                  | Desorption rate (%) |               |                 |               |
|----------------------------------|---------------------|---------------|-----------------|---------------|
|                                  | Asp-LDH-As(III)     | Asp-LDH-As(V) | Phe-LDH-As(III) | Phe-LDH-As(V) |
| NaOH                             | 41.10               | 27.27         | 50.82           | 47.02         |
| Na <sub>2</sub> CO <sub>3</sub>  | 24.02               | 31.92         | 33.13           | 34.72         |
| Na <sub>2</sub> HPO <sub>4</sub> | 23.30               | 38.42         | 34.84           | 52.36         |

**Table S4 Analysis results of practical water sample (mg·L<sup>-1</sup>)**

|   |       |      |      |      |      |      |    |      |      |      |
|---|-------|------|------|------|------|------|----|------|------|------|
|   | As    | B    | Ba   | Mg   | Fe   | Ca   | Cd | K    | Cr   | Cu   |
| 1 | 0.03  | 0.01 | 0.03 | 9.24 | 0.54 | 6.89 | 0  | 1.9  | 0    | 0.01 |
| 2 | 1.11  | 0.07 | 0.04 | 7.69 | 0    | 6.64 | 0  | 9.8  | 0    | 0.01 |
| 3 | 0.02  | 0.03 | 0.05 | 14.4 | 1.58 | 6.19 | 0  | 3.44 | 0    | 0.01 |
|   | Na    | Al   | P    | Pb   | Se   | Sr   | V  | Zn   | Sb   | Li   |
| 1 | 10.62 | 0.47 | 0    | 0    | 0    | 0.31 | 0  | 0    | 0.18 | 0.01 |
| 2 | 36.09 | 0.21 | 0.02 | 0    | 0    | 0.45 | 0  | 0.07 | 0.1  | 0.09 |
| 3 | 13.91 | 1.3  | 0    | 0    | 0    | 0.54 | 0  | 0    | 0.67 | 0.03 |

**Table S5 Surface Element Composition of materials after adsorption of arsenic**

| Elements<br>(At%)                                                | C     | O     | Mg   | Fe   | Zn   | As   | Total |
|------------------------------------------------------------------|-------|-------|------|------|------|------|-------|
| Mg <sub>7</sub> Zn <sub>1</sub> Fe <sub>4</sub> -Asp-LDH-As(V)   | 15.95 | 67.3  | 9.61 | 6.46 | 0.58 | 0.1  | 100   |
| Mg <sub>7</sub> Zn <sub>1</sub> Fe <sub>4</sub> -Asp-LDH-As(III) | 20.39 | 62.18 | 8.78 | 7.8  | 0.63 | 0.22 | 100   |
| Mg <sub>7</sub> Zn <sub>1</sub> Fe <sub>4</sub> -Phe-LDH-As(V)   | 18.57 | 64.44 | 9.79 | 5.58 | 1.59 | 0.04 | 100   |
| Mg <sub>7</sub> Zn <sub>1</sub> Fe <sub>4</sub> -Phe-LDH-As(III) | 16.81 | 65.14 | 9.84 | 6.09 | 1.91 | 0.21 | 100   |

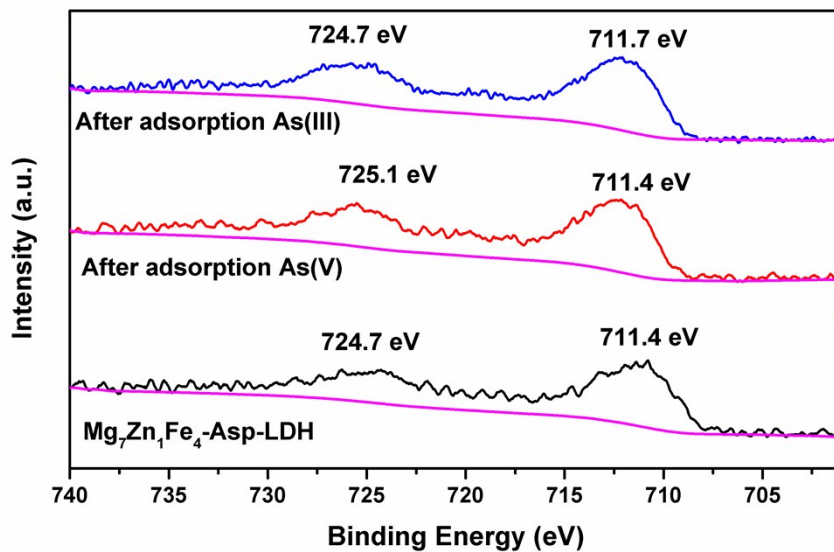**Fig.S6 XPS spectra ( Fe2p scan ) of Mg<sub>7</sub>Zn<sub>1</sub>Fe<sub>4</sub>-Asp-LDH before and after adsorption of arsenic.**
